# Supplementary material for: Cl 2 − chemical ionization mass spectrometry (Cl 2 -CIMS) for the measurement of acyl peroxy radicals
Source: Royal Society of Chemistry journal article supplement (doi:10.1039/d5ea00043b), 2025-01-01
Supplement: d5ea00043b1.pdf [file d5ea00043b1.pdf]

Supporting Information for:  $\text{Cl}_2^-$  chemical ionization mass spectrometry ( $\text{Cl}_2$ -CIMS) for the  
measurement of acyl peroxy radicals

Tyson C. Berg<sup>1</sup>, Michael F. Link<sup>1,†</sup>, Delphine K. Farmer<sup>1,\*</sup>

<sup>1</sup>Department of Chemistry, Colorado State University, Fort Collins, Colorado 80523, United States

<sup>†</sup>Present address: Engineering Laboratory, National Institute of Standards and Technology, Gaithersburg, Maryland 20899, USA.

\*Corresponding author: Delphine K. Farmer- Department of Chemistry, Colorado State University, Fort Collins, Colorado 80523, United States. Email: [delphine.farmer@colostate.edu](mailto:delphine.farmer@colostate.edu)

## Contents

|                                                                                                                                              |        |
|----------------------------------------------------------------------------------------------------------------------------------------------|--------|
| Figure S1: Diagram and details on dV scans                                                                                                   | Pg. 2  |
| Figure S2: Relative Acid Sensitivities                                                                                                       | Pg. 3  |
| Figure S3: Analyte response to ion-molecule reactor pressure                                                                                 | Pg. 4  |
| Figure S4: Reagent ion response to ion-molecule reactor $\text{pH}_2\text{O}$                                                                | Pg. 5  |
| Figure S5: Analyte response to ion-molecule reactor $\text{pH}_2\text{O}$                                                                    | Pg. 6  |
| Figure S6: Analyte response to dV scanning                                                                                                   | Pg. 7  |
| Figure S7: $\text{CH}_3\text{C}(\text{O})\text{O}_2$ Sensitivities                                                                           | Pg. 8  |
| Figure S8: $\text{RC}(\text{O})\text{O}_2$ signal production during MEK photolysis                                                           | Pg. 9  |
| Figure S9: Details on $\text{CH}_3\text{C}(\text{O})\text{O}_2$ , $\text{C}_2\text{H}_5\text{C}(\text{O})\text{O}_2$ sensitivity assumptions | Pg. 10 |
| Table S10: Analyte-Reagent ion correlations for $\text{Cl}_2$ concentration change                                                           | Pg. 11 |
| Figure S11: $\text{Cl}_2(\text{CH}_3\text{C}(\text{O})\text{O}_2)^-$ response to $\text{Cl}_2$ concentration change                          | Pg. 12 |
| Figure S12: Isobutyric and nitric acid response to $\text{Cl}_2$ concentration change                                                        | Pg. 13 |
| Table S13: Reagent ion-specific sensitivity calculations                                                                                     | Pg. 14 |

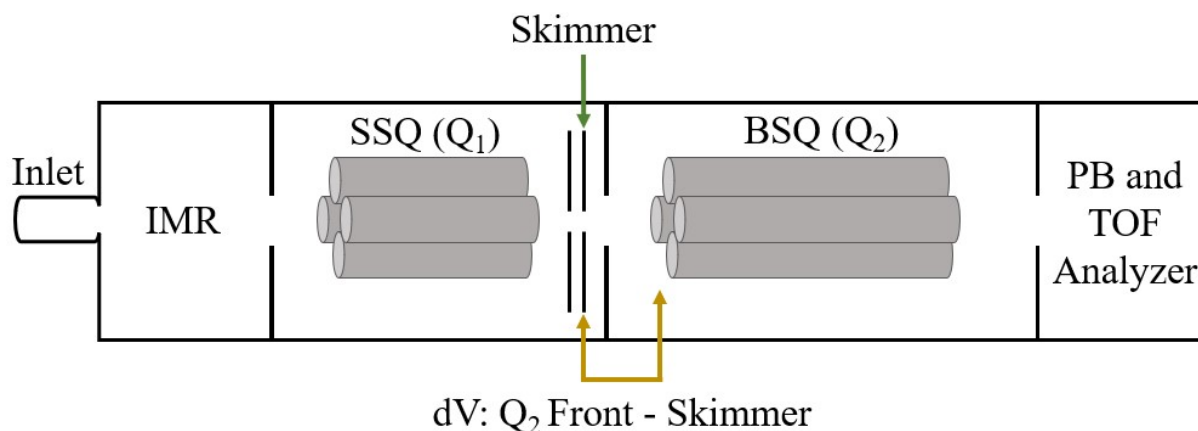

**Figure S1.** Simplified diagram of the CIMS ion optics, including the ion-molecule reactor (IMR), short-segment quadrupole (SSQ), big-segment quadrupole (BSQ), primary beam (PB) and time-of-flight (TOF) mass analyzer segments (with PB and TOF segments combined for simplicity). During voltage scanning experiments, we altered the voltage difference (dV) between the front of the BSQ and the up-flow skimmer plate. For each voltage step, the skimmer plate voltage and the voltage settings of up-flow components were altered by the same amount to maintain constant dVs between adjacent components. The Q<sub>2</sub> Front and down-flow components remained unchanged across the dV scan steps. We maintained IMR total pressure of 65 mbar and water vapor pressure of 0.5 mbar for dV scan experiments. Normal operating dV was 1.4 V.

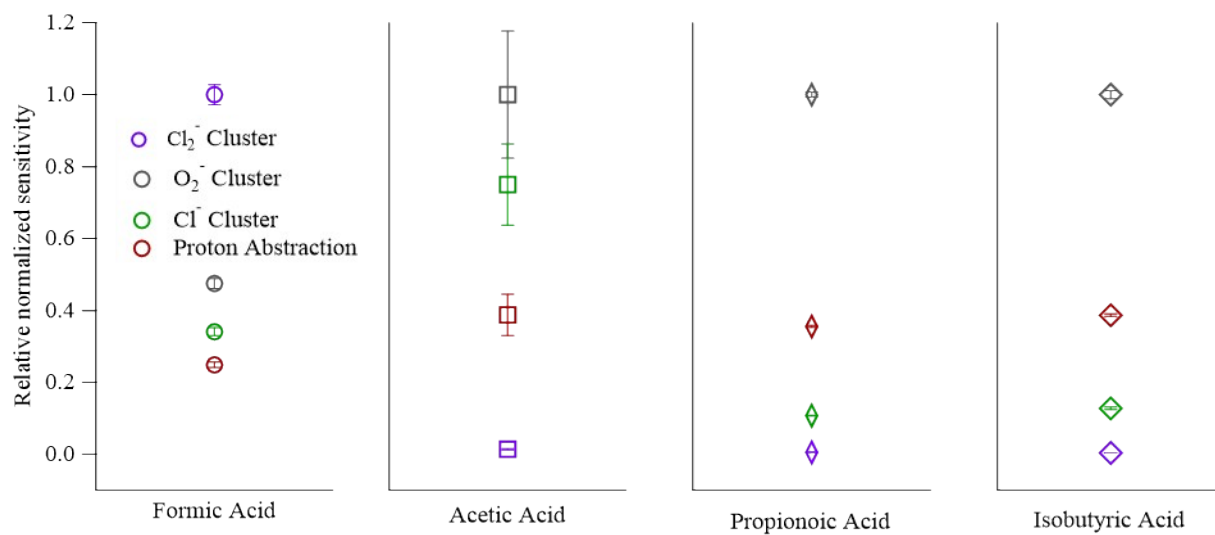

**Figure S2.**  $\text{Cl}_2$ -CIMS sensitivities to examined organic acids. Sensitivities to various product ions at set relative to the most sensitive ion.

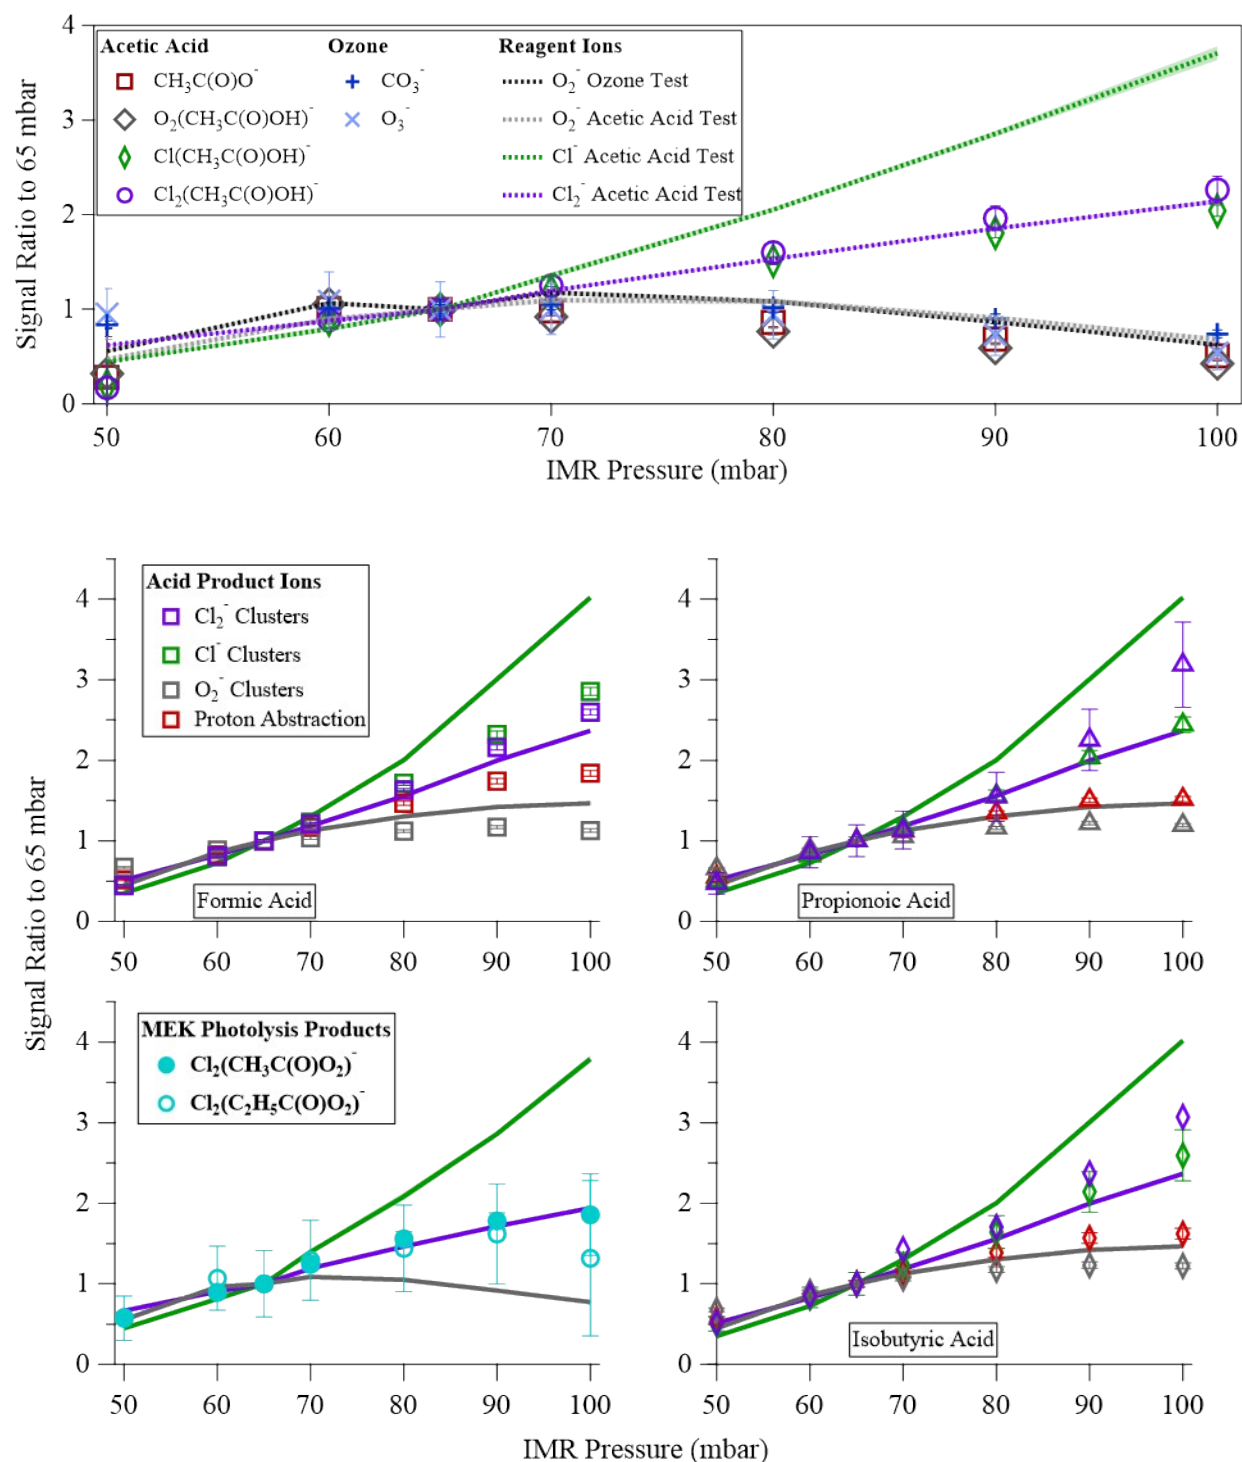

**Figure S3.** Analyte ion signal responses to IMR pressure change (50 to 100 mbar), with background reagent ion counts at each pressure setting included (lines). During pressure change tests, we maintained IMR water vapor pressures of ca. 0.5 mbar and  $dV = 1.4$  V between the skimmer and BSQ front. Error bars represent standard deviation of the signal average at each step.  $\text{Cl}_2(\text{C}_3\text{H}_7\text{C}(\text{O})\text{OH})^-$  error bars not included for ease of visualization.

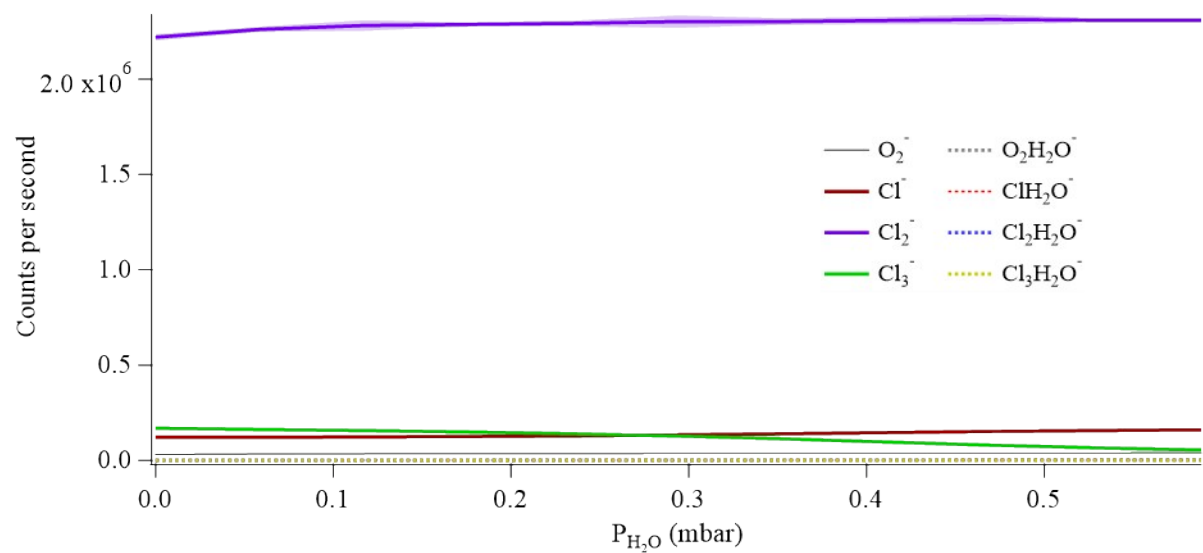

**Figure S4.** Reagent ion response to changes in the ion-molecule reactor water vapor pressure. During water vapor pressure modulation, we maintained IMR pressure of 65 mbar and  $dV = 1.4$  V between the skimmer and BSQ front.

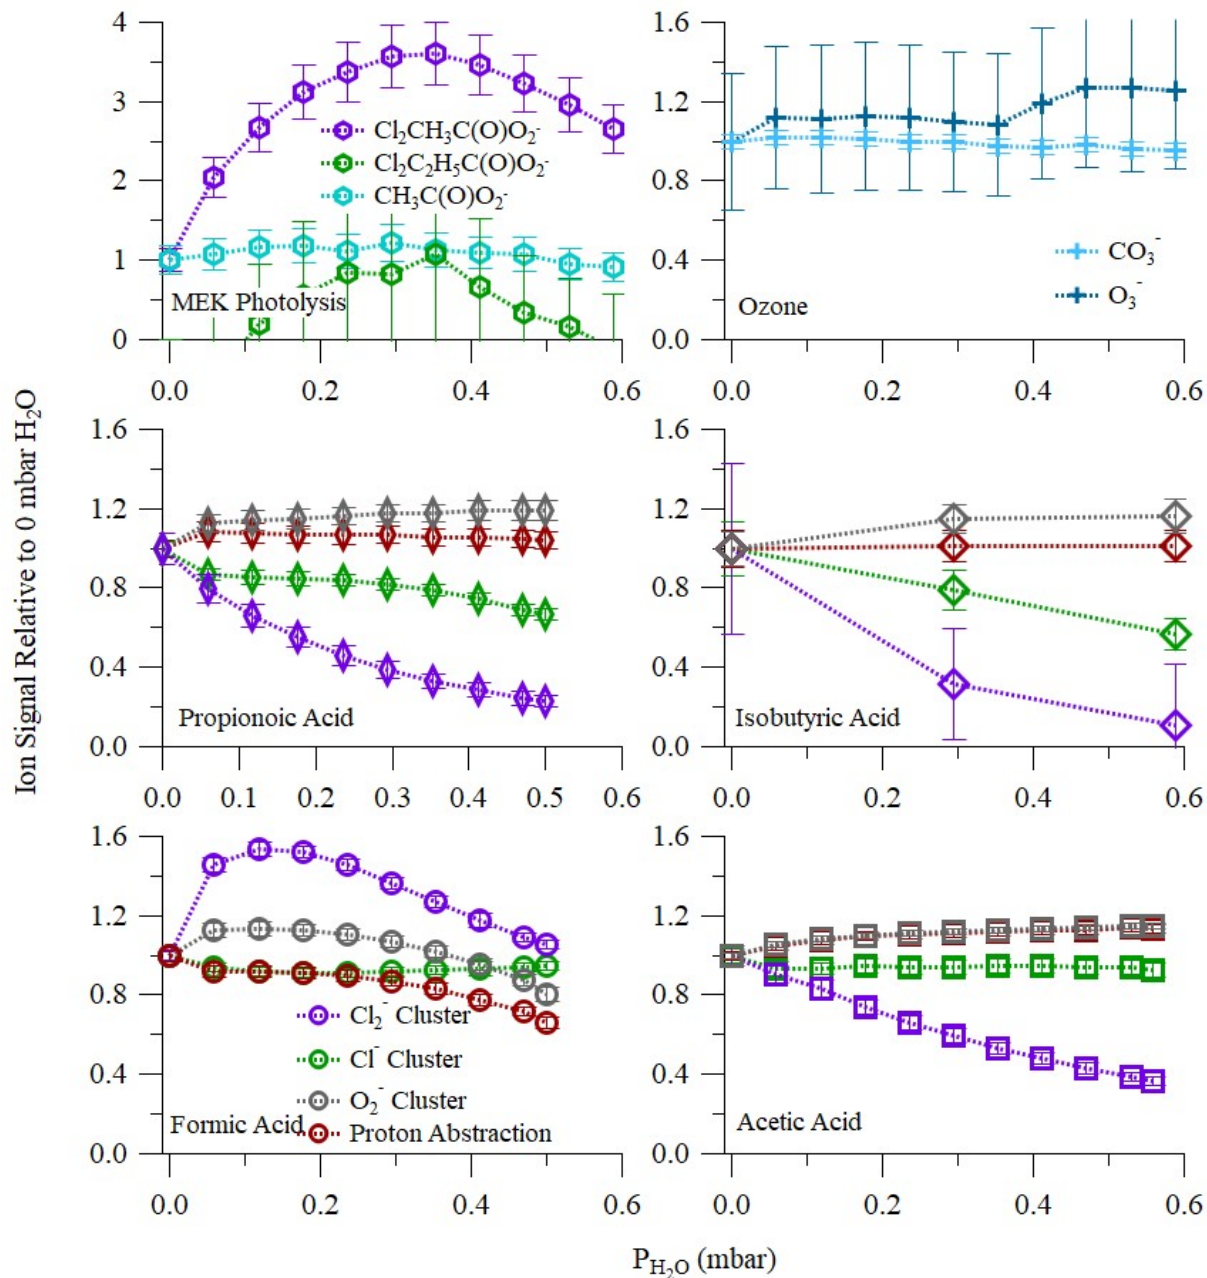

**Figure S5.** Data for ion-molecule reactor water vapor pressure impacts on analyte ion signal. Ion signal for each vapor pressure setting relative to signal from dry ion-molecule reactor. The influence of water vapor pressure on analyte detection was much larger than the observed impact on reagent ion signals. These impacts were also largest for  $\text{Cl}_2^-$  clusters and generally small ( $\pm 20\%$ ) for ions that resulted from reaction with  $\text{O}_2^-$ .

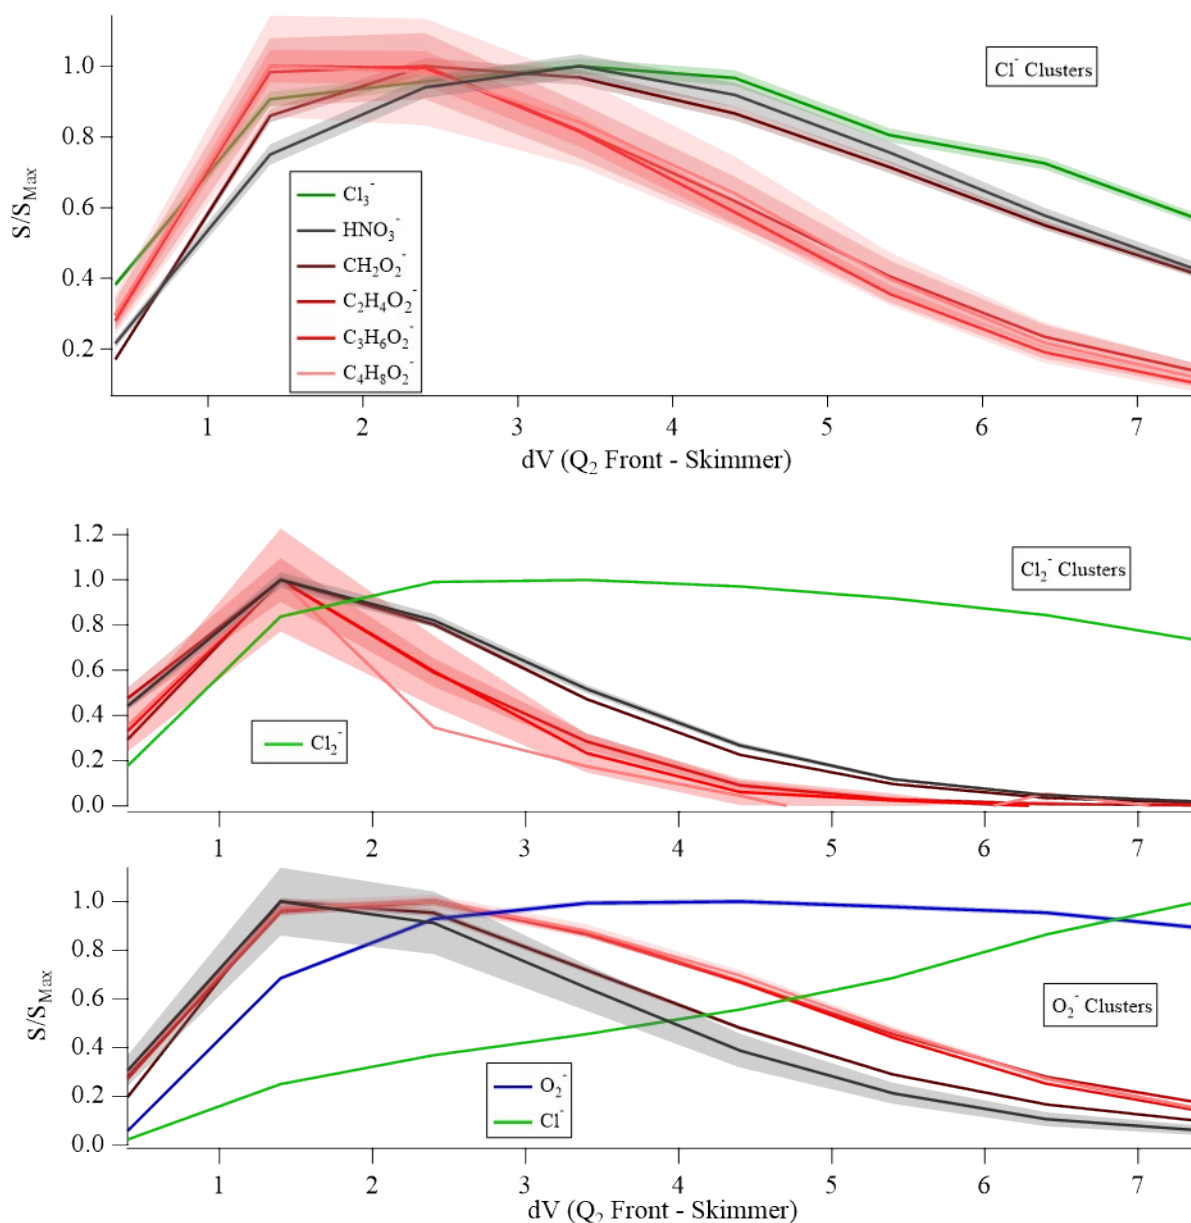

**Figure S6.** dV scan data for the examined organic acids and HNO<sub>3</sub> (see Figure S12 for information on the HNO<sub>3</sub> source and HNO<sub>3</sub> use in specific supplemental tests). (Upper) During dV scan tests of select standards, the  $dV_{50}$  for all Cl<sup>-</sup> clusters was achieved at or below  $dV \approx 7.5$ , while the Cl<sub>3</sub><sup>-</sup>  $dV_{50}$  exists somewhere slightly above this. This result suggests that Cl<sub>3</sub><sup>-</sup> has a greater binding energy than Cl<sup>-</sup> cluster binding energy with observed analyte ions and Cl<sup>-</sup> transfer from Cl<sub>3</sub><sup>-</sup> to any of the analytes studied here is unlikely. Included in middle and lower graphs are the Cl<sub>2</sub><sup>-</sup> and O<sub>2</sub><sup>-</sup> clusters signals across the same set of dV scan tests. Cl<sup>-</sup> background signal change is included in with the O<sub>2</sub><sup>-</sup> clusters and behaves similarly to the non-cluster analyte ions (H<sup>+</sup> abstraction products; not shown). Shading represents the 1 $\sigma$  SDs for each ion signal but is not shown for Cl<sub>2</sub>(C<sub>4</sub>H<sub>8</sub>O<sub>2</sub>)<sup>-</sup> for ease of visualization (less than 10 cps at any  $dV$  for this ion leads to large relative signal error).

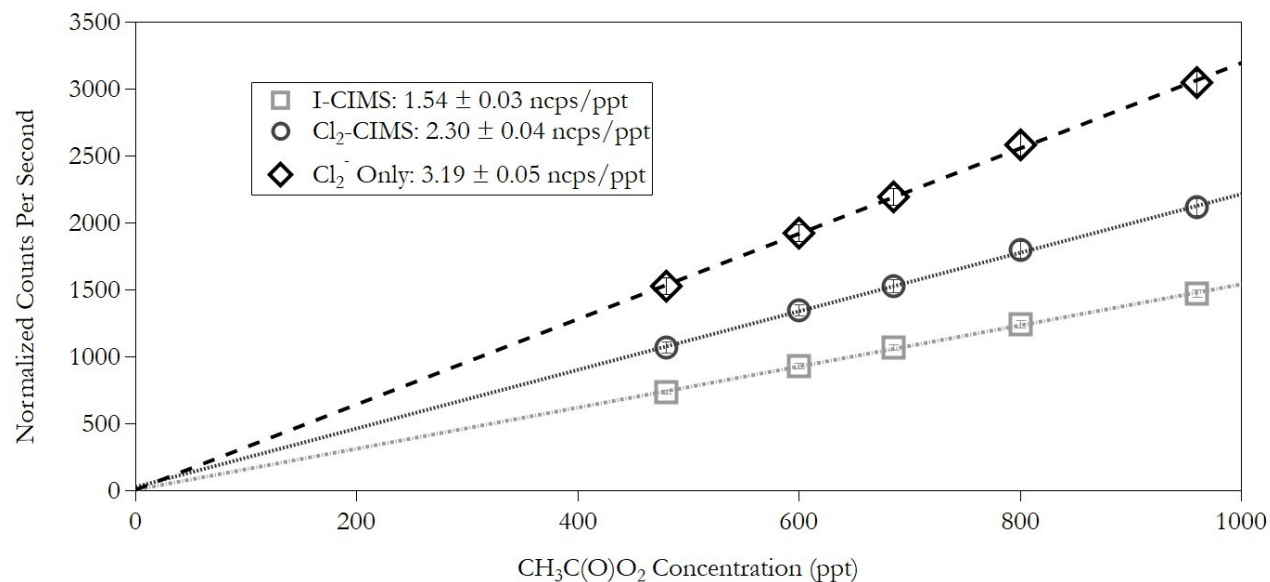

**Figure S7** 1-minute average signal (background-subtracted and normalized per million reagent ions) for  $X(\text{CH}_3\text{C}(\text{O})\text{O}_2)^-$  ( $X = \text{I}$  or  $\text{Cl}_2$ ) during  $\text{CH}_3\text{C}(\text{O})\text{O}_2$  calibrations. Light-gray squares represent  $\text{I}(\text{CH}_3\text{C}(\text{O})\text{O}_2)^-$  from the I-CIMS. Gray circles show  $\text{Cl}_2(\text{CH}_3\text{C}(\text{O})\text{O}_2)^-$  from the  $\text{Cl}_2$ -CIMS normalized to the sum of  $\text{O}_2^-$ ,  $\text{Cl}^-$ ,  $\text{Cl}_2^-$ , and  $\text{Cl}_3^-$ . Black diamonds also represent  $\text{Cl}_2(\text{CH}_3\text{C}(\text{O})\text{O}_2)^-$  but normalized to  $\text{Cl}_2^-$  only.



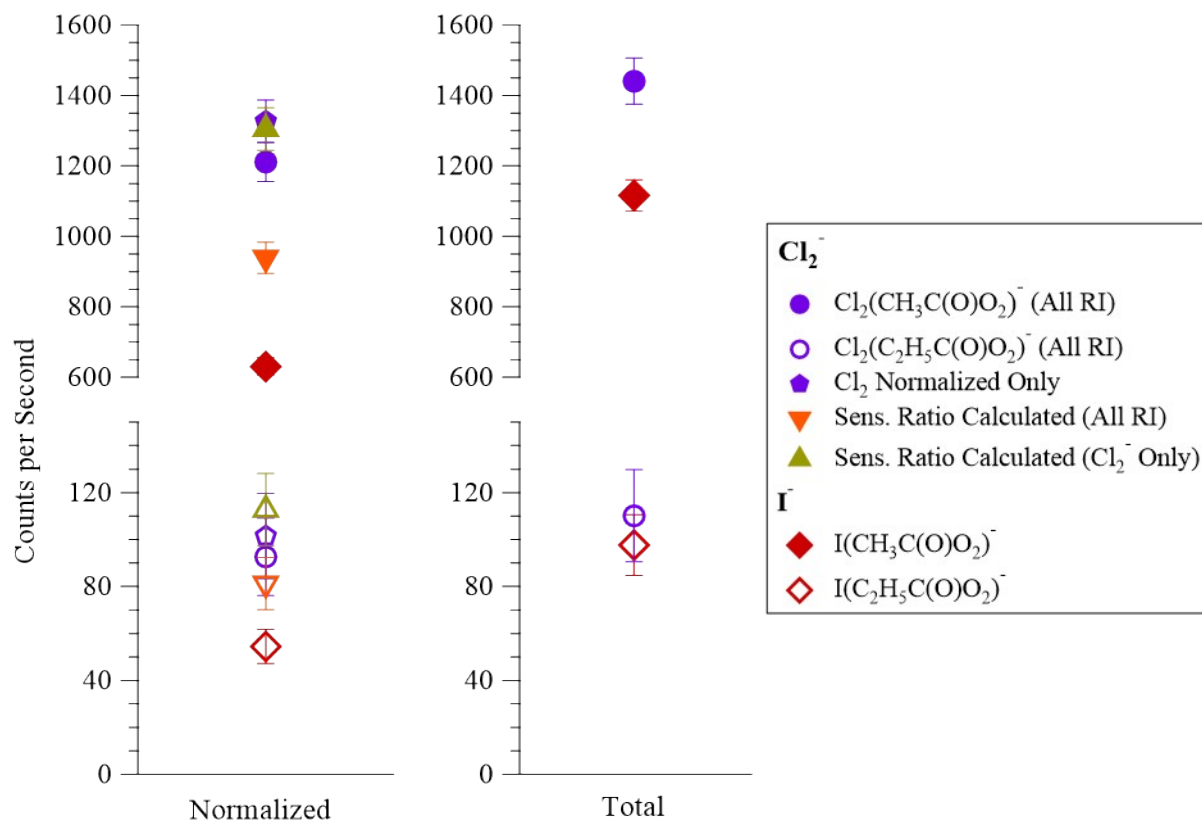

**Figure S8.** Total (right) and normalized (left) signals from the MEK quantum yield tests (filled markers for CH<sub>3</sub>C(O)O<sub>2</sub> and open markers for C<sub>2</sub>H<sub>5</sub>C(O)O<sub>2</sub>). Cl<sub>2</sub>-CIMS signals are shown normalized to total reagent ion signal (All RI; circles on left) and Cl<sub>2</sub><sup>-</sup> only (pentagons). We produced expected Cl<sub>2</sub>-CIMS signals (Sens. Ratio Calculated) by multiplying the I-CIMS normalized signal and the sensitivity ratios from PAN calibrations (Figure S7). Comparison of actual and expected counts normalized to Cl<sub>2</sub><sup>-</sup> shows close agreement, while the expected signal from normalization to all reagent Cl<sub>2</sub>-CIMS reagent ions is below the observed signal. This agreement of Cl<sub>2</sub><sup>-</sup> normalized RC(O)O<sub>2</sub> signal ratios between the MEK photolysis tests and the CH<sub>3</sub>C(O)O<sub>2</sub> calibrations occurs despite differences in the Cl<sub>2</sub> bulb concentration and age and resulting differences in Cl<sub>2</sub><sup>-</sup> contribution to total reagent ion signal. This suggests a direct relationship between Cl<sub>2</sub><sup>-</sup> background counts and Cl<sub>2</sub>(RC(O)O<sub>2</sub>)<sup>-</sup> signal across the two tests.

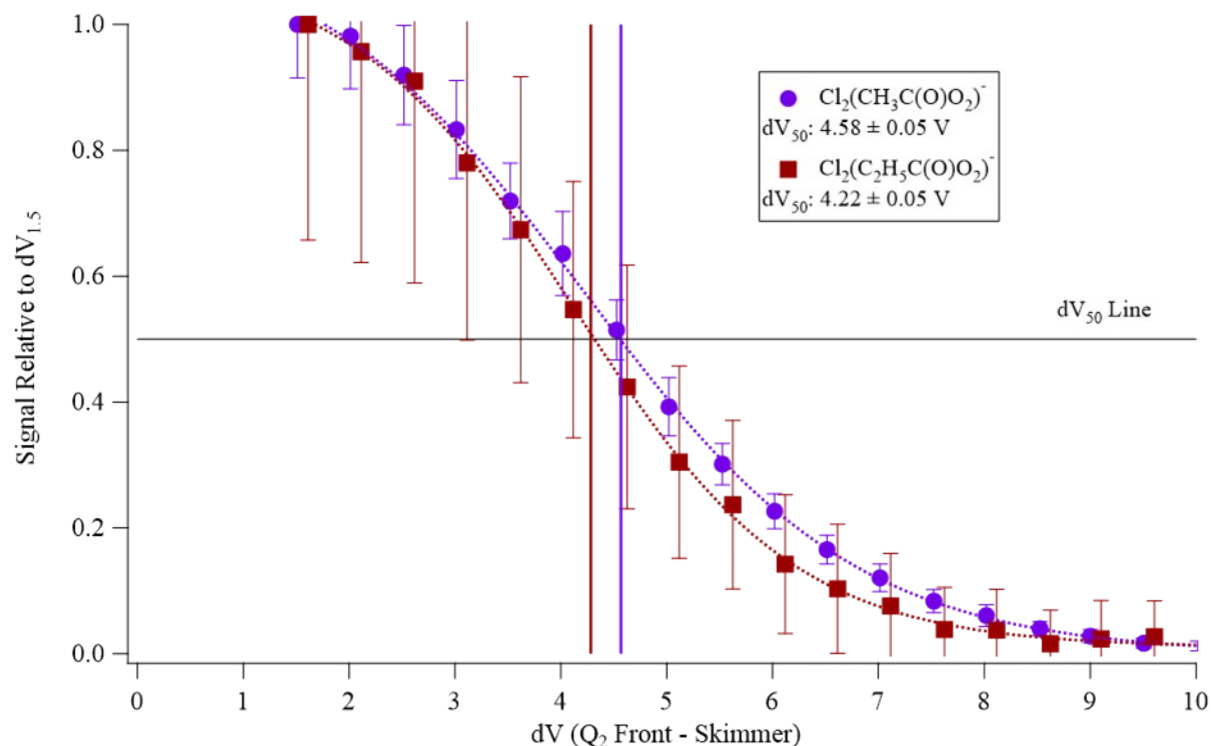

**Figure S9.** dV scan data for  $\text{Cl}_2(\text{CH}_3\text{C}(\text{O})\text{O}_2)^-$  and  $\text{Cl}_2(\text{C}_2\text{H}_5\text{C}(\text{O})\text{O}_2)^-$  (ratio relative to  $dV = \sim 1.5$ ) measured from MEK photolysis in the photolysis reactor system. Dashed lines represent sigmoidal fits to the analyte signal ratio data and solid vertical lines indicate the position of half-maximum signal in dV-space ( $dV_{50}$ ). We use the similar  $dV_{50}$  values for  $\text{Cl}_2(\text{CH}_3\text{C}(\text{O})\text{O}_2)^-$  and  $\text{Cl}_2(\text{C}_2\text{H}_5\text{C}(\text{O})\text{O}_2)^-$  observed in this experiment to assume a similar cluster binding energy and, therefore, similar  $\text{Cl}_2^-$  CIMS sensitivity to  $\text{CH}_3(\text{O})\text{O}_2$  and  $\text{C}_2\text{H}_5\text{C}(\text{O})\text{O}_2$ .  $\text{Cl}_2(\text{C}_2\text{H}_5\text{C}(\text{O})\text{O}_2)^-$  data shifted by +0.2 dV for ease of visibility.

| Analyte               | Ion                  | Reagent Ion |       |        |       |          |       |          |       |
|-----------------------|----------------------|-------------|-------|--------|-------|----------|-------|----------|-------|
|                       |                      | $O_2^-$     |       | $Cl^-$ |       | $Cl_2^-$ |       | $Cl_3^-$ |       |
|                       |                      | $R^2$       | Slope | $R^2$  | Slope | $R^2$    | Slope | $R^2$    | Slope |
| Nitric Acid           | $NO_3^-$             | 0.96        | 0.26  | 0.66   | -0.97 | 0.89     | -0.70 | 0.77     | -0.03 |
|                       | $O_2NHO_3^-$         | 1.00        | 0.98  | 0.72   | -3.65 | 0.93     | -2.60 | 0.79     | -0.13 |
|                       | $ClHNO_3^-$          | 0.99        | -0.46 | 0.73   | 1.73  | 0.93     | 1.23  | 0.79     | 0.06  |
|                       | $Cl_2HNO_3^-$        | 0.95        | -0.32 | 0.92   | 1.36  | 1.00     | 0.89  | 0.54     | 0.03  |
| Formic Acid           | $HC(O)O^-$           | 1.00        | 1.02  | 0.93   | -2.55 | 1.00     | -1.86 | 0.72     | -0.11 |
|                       | $O_2HC(O)OH^-$       | 1.00        | 1.01  | 0.92   | -2.52 | 1.00     | -1.85 | 0.74     | -0.11 |
|                       | $ClHC(O)OH^-$        | 0.92        | -0.43 | 0.68   | 0.96  | 0.86     | 0.76  | 0.95     | 0.05  |
|                       | $Cl_2HC(O)OH^-$      | 0.92        | -0.26 | 1.00   | 0.72  | 0.96     | 0.50  | 0.50     | 0.02  |
| Acetic Acid           | $CH_3C(O)O^-$        | 0.99        | 1.02  | 0.90   | -2.54 | 0.98     | -1.86 | 0.74     | -0.11 |
|                       | $O_2CH_3C(O)OH^-$    | 0.99        | 1.03  | 0.91   | -2.54 | 0.98     | -1.87 | 0.74     | -0.11 |
|                       | $ClCH_3C(O)OH^-$     | 0.99        | -0.85 | 0.95   | 2.16  | 1.00     | 1.56  | 0.68     | 0.09  |
|                       | $Cl_2CH_3C(O)OH^-$   | 0.75        | -0.21 | 0.94   | 0.62  | 0.83     | 0.41  | 0.29     | 0.02  |
| Propanoic Acid        | $C_2H_5C(O)O^-$      | 0.98        | 1.01  | 0.95   | -3.73 | 0.99     | -2.38 | 0.67     | -0.12 |
|                       | $O_2C_2H_5C(O)OH^-$  | 0.98        | 1.01  | 0.95   | -3.73 | 0.99     | -2.38 | 0.67     | -0.12 |
|                       | $ClC_2H_5C(O)OH^-$   | 0.95        | -0.42 | 1.00   | 1.63  | 0.98     | 1.01  | 0.55     | 0.04  |
|                       | $Cl_2C_2H_5C(O)OH^-$ | 0.52        | -0.18 | 0.74   | 0.79  | 0.59     | 0.44  | 0.11     | 0.01  |
| Isobutyric Acid       | $C_3H_7C(O)O^-$      | 0.99        | 1.03  | 0.80   | -4.23 | 0.96     | -3.29 | 0.63     | -0.12 |
|                       | $O_2C_3H_7C(O)OH^-$  | 0.99        | 1.03  | 0.80   | -4.24 | 0.96     | -3.29 | 0.63     | -0.12 |
|                       | $ClC_3H_7C(O)OH^-$   | 0.84        | -0.31 | 0.93   | 1.50  | 0.97     | 1.09  | 0.35     | 0.03  |
|                       | $Cl_2C_2H_5C(O)OH^-$ | 0.06        | 0.05  | 0.05   | 0.19  | 0.00     | 0.00  | 0.39     | -0.02 |
| Ozone                 | $O_3^-$              | 0.99        | 0.98  | 0.75   | -3.11 | 0.90     | -2.59 | 0.71     | -0.11 |
|                       | $CO_3^-$             | 0.99        | 0.98  | 0.75   | -3.12 | 0.90     | -2.59 | 0.70     | -0.11 |
| Acetyl Peroxy Radical | $CH_3C(O)O^-$        | 0.98        | 0.93  | 0.77   | -5.70 | 1.00     | -3.74 | 0.72     | -0.14 |
|                       | $CH_3C(O)OO^-$       | 0.99        | 0.99  | 0.75   | -6.03 | 1.00     | -3.98 | 0.73     | -0.15 |
|                       | $Cl_2CH_3C(O)OO^-$   | 0.30        | 0.12  | 0.00   | 0.02  | 0.18     | -0.36 | 0.72     | -0.03 |

**Table S10.**  $R^2$  and slopes for all correlation fits of analyte ions and reagent ion counts presented in Figures 5 and S12.  $Cl_2CH_3C(O)OO^-$  data from the initial 40 ppm tank test are shown here. Linear fits of  $Cl_2CH_3C(O)OO^-$  data to the retest of  $Cl_2$  concentration correlations with 40 ppm and 10 ppm  $Cl_2$  tanks (Figure S11) returned Slope = 0,  $R^2$  = 0.002 and Slope = 0.53,  $R^2$  = 0.99, respectively.

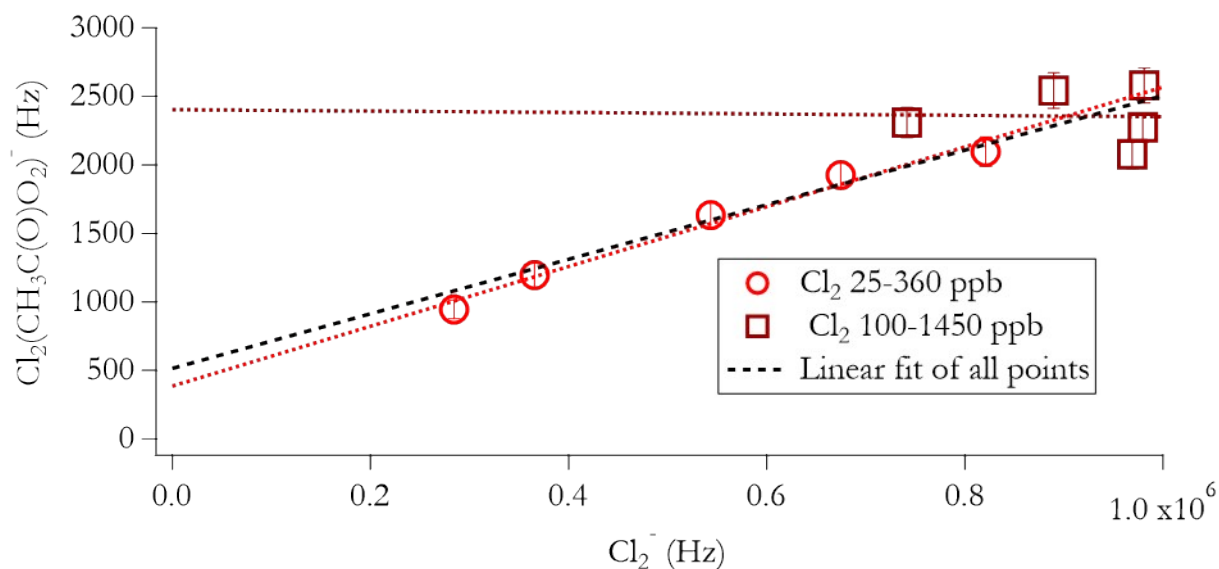

**Figure S11.** Observed relationship between  $\text{Cl}_2(\text{CH}_3\text{C}(\text{O})\text{O}_2)^-$  (produced by acetone photolysis) and  $\text{Cl}_2^-$  during alteration of the  $\text{Cl}_2$  reagent gas mixture. 10 ppm  $\text{Cl}_2$  cylinder (25-360 ppb  $\text{Cl}_2$  in reagent gas mixture) data shown with light red circles and 40 ppm cylinder (100-1450 ppb  $\text{Cl}_2$  in reagent gas mixture) data shown with dark red diamonds. Dotted lines are the linear least-squared fits to the 10 ppm and 40 ppm datasets, the black dashed line is the linear least-squared fit to the whole dataset.  $\text{Cl}_2$  concentrations from the 40-ppm tank reflect those used for acid and ozone response in Figure 5 and Table S10. The non-linear relationship between  $\text{Cl}_2^-$  background counts and  $\text{Cl}_2(\text{CH}_3\text{C}(\text{O})\text{O}_2)^-$  signal here indicates that  $\text{Cl}_2(\text{CH}_3\text{C}(\text{O})\text{O}_2)^-$  was only directly dependent on  $\text{Cl}_2^-$  up to  $\text{Cl}_2$  reagent gas concentrations of ca. 400 ppb. Past this concentration, it is possible that secondary chemistry in the IMR, perhaps involving reactions of  $\text{Cl}$  with  $\text{CH}_3\text{C}(\text{O})\text{O}_2$ , diminishes observed sensitivity. Further testing of this reagent ion system is needed to stabilize and maximize  $\text{Cl}_2^-$  CIMS response to  $\text{RC}(\text{O})\text{O}_2$ .

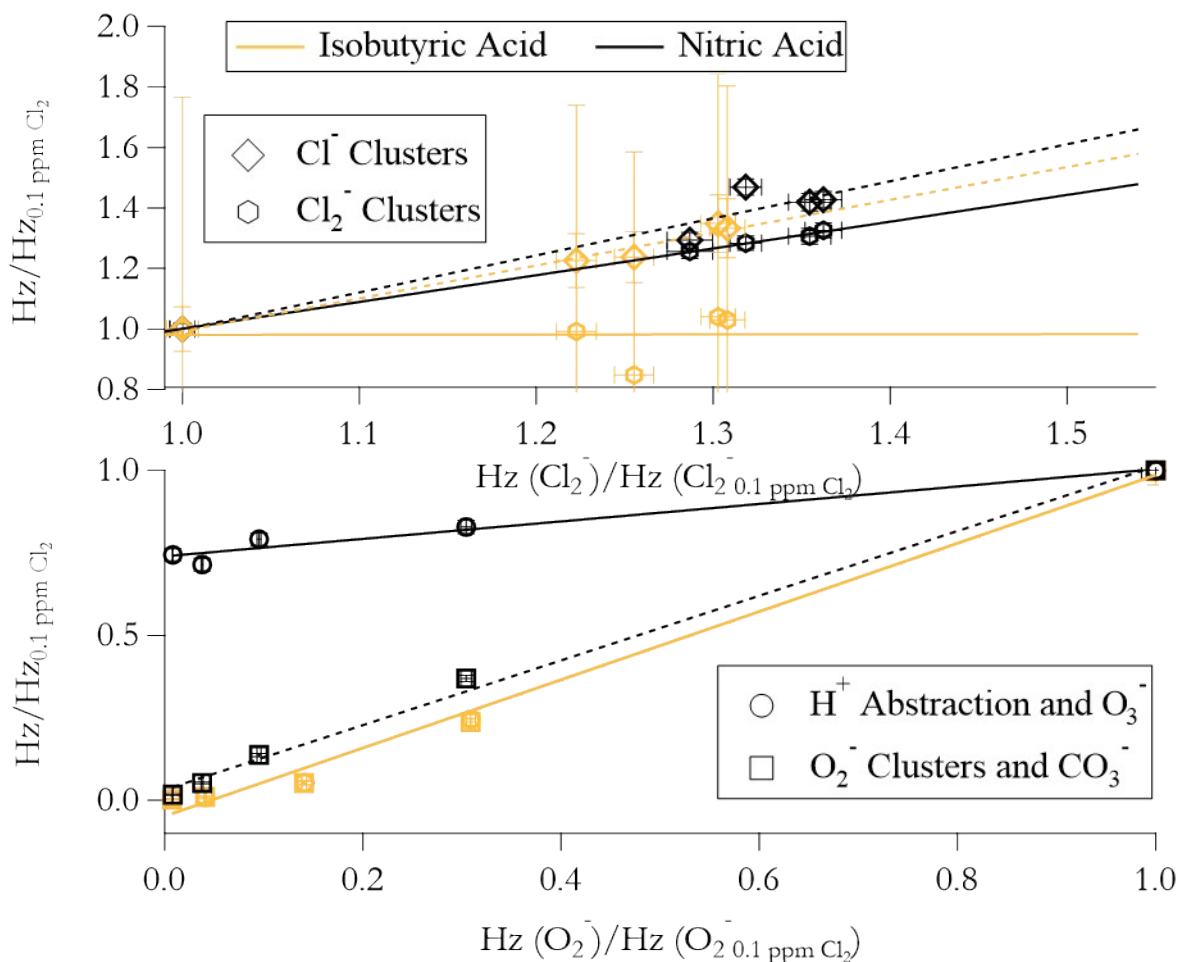

**Figure S12.** Analyte ion correlation plots for analytes not included in Figure 4.v. These are organized in the same manner as in main text Figure 5. Isobutyric acid was left off to improve readability of the graph. Isobutyric acid-Cl<sup>-</sup> clusters behaved similarly to other organic acids. Cl<sub>2</sub><sup>-</sup> cluster sensitivity was poor. We created an HNO<sub>3</sub> permeation tube, used identically to those described for organic acids. However, we did not calibrate the Cl<sub>2</sub>-CIMS for HNO<sub>3</sub>. HNO<sub>3</sub> was examined in this test for an expected reaction with Cl<sub>3</sub><sup>-</sup> (see Amelynck et al. reference from main text). No HNO<sub>3</sub> product ion correlates clearly to Cl<sub>3</sub><sup>-</sup>. dV scans (Figure S6) indicated that Cl<sub>3</sub><sup>-</sup> was more tightly bound than any analyte ion, including those of HNO<sub>3</sub>. Cl<sub>3</sub><sup>-</sup> was less reactive than expected from limited literature information.

|             | Formic Acid                                    | Acetic Acid                                           | Propanoic Acid                                                      | Isobutyric Acid                                                     | Ozone                        |
|-------------|------------------------------------------------|-------------------------------------------------------|---------------------------------------------------------------------|---------------------------------------------------------------------|------------------------------|
| Ion         | HC(O)O <sup>-</sup>                            | CH <sub>3</sub> C(O)O <sup>-</sup>                    | C <sub>2</sub> H <sub>5</sub> C(O)O <sup>-</sup>                    | C <sub>3</sub> H <sub>7</sub> C(O)O <sup>-</sup>                    | CO <sub>3</sub> <sup>-</sup> |
| Reagent     | O <sub>2</sub> <sup>-</sup>                    | O <sub>2</sub> <sup>-</sup>                           | O <sub>2</sub> <sup>-</sup>                                         | O <sub>2</sub> <sup>-</sup>                                         | O <sub>2</sub> <sup>-</sup>  |
| Sensitivity | 6.6 ± .2                                       | 38 ± 3                                                | 9.79 ± .06                                                          | 5.98 ± .03                                                          | 56 ± 4                       |
| Ion         | O <sub>2</sub> (HC(O)OH) <sup>-</sup>          | O <sub>2</sub> (CH <sub>3</sub> C(O)OH) <sup>-</sup>  | O <sub>2</sub> (C <sub>2</sub> H <sub>5</sub> C(O)OH) <sup>-</sup>  | O <sub>2</sub> (C <sub>3</sub> H <sub>7</sub> C(O)OH) <sup>-</sup>  | O <sub>3</sub> <sup>-</sup>  |
| Reagent     | O <sub>2</sub> <sup>-</sup>                    | O <sub>2</sub> <sup>-</sup>                           | O <sub>2</sub> <sup>-</sup>                                         | O <sub>2</sub> <sup>-</sup>                                         | O <sub>2</sub> <sup>-</sup>  |
| Sensitivity | 10.8 ± .2                                      | 98 ± 12                                               | 24.8 ± .2                                                           | 13.6 ± .1                                                           | 0.7 ± 0.7                    |
| Ion         | Cl(HC(O)OH) <sup>-</sup>                       | Cl(CH <sub>3</sub> C(O)OH) <sup>-</sup>               | Cl(C <sub>2</sub> H <sub>5</sub> C(O)OH) <sup>-</sup>               | Cl(C <sub>3</sub> H <sub>7</sub> C(O)OH) <sup>-</sup>               |                              |
| Reagent     | Cl <sup>-</sup> + Cl <sub>2</sub> <sup>-</sup> | Cl <sup>-</sup> + Cl <sub>2</sub> <sup>-</sup>        | Cl <sup>-</sup> + Cl <sub>2</sub> <sup>-</sup>                      | Cl <sup>-</sup> + Cl <sub>2</sub> <sup>-</sup>                      |                              |
| Sensitivity | .41 ± .01                                      | 1.3 ± 0.1                                             | .351 ± .001                                                         | .244 ± .009                                                         |                              |
| Ion         | Cl <sub>2</sub> (HC(O)OH) <sup>-</sup>         | Cl <sub>2</sub> (CH <sub>3</sub> C(O)OH) <sup>-</sup> | Cl <sub>2</sub> (C <sub>2</sub> H <sub>5</sub> C(O)OH) <sup>-</sup> | Cl <sub>2</sub> (C <sub>3</sub> H <sub>7</sub> C(O)OH) <sup>-</sup> |                              |
| Reagent     | Cl <sub>2</sub> <sup>-</sup>                   | Cl <sub>2</sub> <sup>-</sup>                          | Cl <sub>2</sub> <sup>-</sup>                                        | Cl <sub>2</sub> <sup>-</sup>                                        |                              |
| Sensitivity | 1.10 ± 0.02                                    | <b>0.025 ± 0.003</b>                                  | <b>0.0552 ± 0.006</b>                                               | <b>0.024 ± 0.002</b>                                                |                              |

**Table S13.** Sensitivities (in ncps/ppt) for all organic acid and O<sub>3</sub> product ions normalized only using reagent ion signals that correspond to the associated ionizing reaction. In each section ‘ion’ denotes the measured product ion and ‘reagent’ provides the reagent ion, or sum of reagent ions, used for normalization. Normalized counts per second (ncps) are calculated per million corresponding reagent ion(s), as in the main text.
